# Supplementary material
Source: PubMed Central journal article supplement (PMC6789218)
Supplement: ajtr0011-6084-f5.pdf [file ajtr0011-6084-f5.pdf]

## FTO facilitates HCC via PKM2

**Table S1.** Primers sequences for qRT-PCR and sequences of shRNA

|          | Sequences                            |
|----------|--------------------------------------|
| FTO      | Forward, 5'-ACTTGGCTCCCTTATCTGACC-3' |
|          | Reverse, 5'-TGTGCAGTGTGAGAAAGGCTT-3' |
| PKM2     | Forward, 5'-ATGTCGAAGCCCCATAGTGAA-3' |
|          | Reverse, 5'-TGGGTGGTGAATCAATGTCCA-3' |
| sh-FTO-1 | 5'-AATCGGCCTCCTTGT-3'                |
| sh-FTO-2 | 5'-ATTAAGTTCCCGCCAGCCGT-3'           |
| GAPDH    | Forward, 5'-AGAAGGCTGGGGCTCATTG-3'   |
|          | Reverse, 5'-AGGGGCCATCCACAGTCTTC-3'  |
